# Supplementary material for: Automated Medical Chart Review for Breast Cancer: A Novel Natural Language Processing Software System
Source: bioRxiv or medRxiv preprint supplement (doi:10.1101/2021.05.04.21256134), 2021-05-04
Supplement: Supplementary file [file media-1.pdf]

## Appendices

Synoptic Report: Breast Invasive Carcinoma

Part(s) Involved:

A: right breast - long lateral, short superior

Synoptic Report:

SPECIMEN COMMENT

- Pertains To: Specimen A to C

SPECIMEN

- Breast; Total mastectomy; Right

TUMOUR

- Invasive Carcinoma: Present

- Histologic Type: Invasive carcinoma of no special type (ductal, not otherwise specified)

- Histologic Grade (Nottingham Histologic Score)

- Glandular (Acinar) / Tubular Differentiation: Score 3

- Nuclear Pleomorphism: Score 3

- Mitotic Rate: Score 3

- Overall Nottingham Score: Grade 3

- Tumour Size: 1.9 Millimeters (mm)

- Tumour Focality: Single focus of invasive carcinoma

- Tumour Site: 10 o'clock

- Lymphovascular Invasion: Not identified

- In Situ Component: Present

- In Situ Component Type: DCIS

- Nuclear Grade: Grade III (high)

- Necrosis: Present, focal (small foci or single cell necrosis)

- DCIS Extent: Non extensive

- DCIS Estimated Size: 19 mm

- Architectural Patterns: Cribriform, Solid

MARGINS

- Invasive Carcinoma Margins: Negative for invasive carcinoma

- Distance from Closest Margin: 11 Millimeters (mm)

- Closest Margin: Posterior

- DCIS Margins: Negative for DCIS

- Distance of DCIS from Closest Margin: 11 Millimeters (mm)

- Closest Margin: Posterior

LYMPH NODES, REGIONAL

- Number of Lymph Nodes Examined (sentinel and nonsentinel): 5

- Number of Sentinel Nodes Examined: 5

- Micro / Macro Metastasis: Not identified

- Number of Lymph Nodes with Isolated Tumour Cells: 0

PATHOLOGIC STAGE

- pT1a pN0

ANCILLARY STUDIES

- Best Tumour Block: A4

- Biomarker Testing/Results: Performed, see separate report:

Based on AJCC/UICC TNM, 8th edition; CAP eCC June 2017

----- End of Synoptic Report -----

## Appendix A: Sample Synoptic Pathology Report

| <b>Metric</b>     | <b>(=)</b>  | <b>Formula</b>                     |
|-------------------|-------------|------------------------------------|
| Precision         | PPV         | $\frac{TP}{TP+FP}$                 |
| Recall            | Sensitivity | $\frac{TP}{TP+FN}$                 |
| F-Score           | F           | $\frac{TP}{TP+\frac{1}{2}(FP+FN)}$ |
| Specificity       |             | $\frac{TN}{TN+FP}$                 |
| Net Present Value | NPV         | $\frac{TN}{TN+FN}$                 |
| Accuracy          |             | $\frac{TP+TN}{TP+TN+FP+FN}$        |

Appendix B: Metric formulae used in appendices C, D, E, and F

|           | Invasive Carcinoma | Invasive Histologic Type | Nottingham Score | Glandular Differentiation | Nuclear Pleomorphism | Mitotic Rate | Histologic Grade | Tumour Size (mm) | Tumour Focality | # of Foci | Tumour Site | Lymphovascular Invasion | Insitu Component |
|-----------|--------------------|--------------------------|------------------|---------------------------|----------------------|--------------|------------------|------------------|-----------------|-----------|-------------|-------------------------|------------------|
| Same      | 50                 | 42                       | 49               | 49                        | 50                   | 49           | 50               | 49               | 48              | 51        | 39          | 51                      | 50               |
| Different | 2                  | 0                        | 2                | 1                         | 0                    | 1            | 0                | 0                | 2               | 0         | 1           | 1                       | 1                |
| Missing   | 1                  | 1                        | 1                | 1                         | 1                    | 1            | 1                | 3                | 1               | 1         | 0           | 0                       | 1                |
| Extra     | 0                  | 10                       | 1                | 2                         | 2                    | 2            | 2                | 1                | 2               | 1         | 13          | 1                       | 1                |
| Accuracy  | 0.94               | 0.98                     | 0.94             | 0.96                      | 0.98                 | 0.96         | 0.98             | 0.94             | 0.94            | 0.98      | 0.97        | 0.98                    | 0.96             |

  

|           | Insitu Type | Insitu Nuclear Grade | Necrosis | DCIS Extent | Architectural Patterns | Invasive Carcinoma Margins | Distance from Closest Margin | Closest Margin | DCIS Margins | Distance of DCIS from Closest Margin (mm) | Closest Margin DCIS | Total LN Examined |
|-----------|-------------|----------------------|----------|-------------|------------------------|----------------------------|------------------------------|----------------|--------------|-------------------------------------------|---------------------|-------------------|
| Same      | 43          | 50                   | 48       | 51          | 50                     | 50                         | 48                           | 45             | 39           | 44                                        | 45                  | 51                |
| Different | 1           | 0                    | 1        | 1           | 1                      | 3                          | 0                            | 1              | 5            | 1                                         | 1                   | 1                 |
| Missing   | 1           | 1                    | 1        | 1           | 0                      | 0                          | 4                            | 1              | 0            | 7                                         | 6                   | 1                 |
| Extra     | 8           | 2                    | 3        | 0           | 2                      | 0                          | 1                            | 6              | 9            | 1                                         | 1                   | 0                 |
| Accuracy  | 0.96        | 0.98                 | 0.96     | 0.96        | 0.98                   | 0.94                       | 0.92                         | 0.96           | 0.89         | 0.85                                      | 0.87                | 0.96              |

  

|           | # Sentinel LN Examined | Micro/macro metastasis | # LN w/ Micrometastasis | # LN w/ Macrometastasis | Size of Largest Macrometastasis Deposit | Extranodal Extension | Extent (mm) | Invasive Tumour Size (mm) | # Sentinel Nodes Examined | # Micrometastatic Nodes | # Macrometastatic Nodes | Pathologic Stage |
|-----------|------------------------|------------------------|-------------------------|-------------------------|-----------------------------------------|----------------------|-------------|---------------------------|---------------------------|-------------------------|-------------------------|------------------|
| Same      | 51                     | 52                     | 53                      | 52                      | 52                                      | 52                   | 47          | 50                        | 50                        | 53                      | 52                      | 50               |
| Different | 1                      | 1                      | 0                       | 0                       | 0                                       | 1                    | 0           | 0                         | 1                         | 0                       | 0                       | 0                |
| Missing   | 1                      | 0                      | 0                       | 0                       | 0                                       | 0                    | 0           | 2                         | 1                         | 0                       | 0                       | 2                |
| Extra     | 0                      | 0                      | 0                       | 1                       | 1                                       | 0                    | 6           | 1                         | 1                         | 0                       | 1                       | 1                |
| Accuracy  | 0.96                   | 0.98                   | 1                       | 1                       | 1                                       | 0.98                 | 1           | 0.96                      | 0.96                      | 1                       | 1                       | 0.96             |

|           | Invasive Carcinoma | Invasive Histologic Type | Nottingham Score | Glandular Differentiation | Nuclear Pleomorphism | Mitotic Rate | Histologic Grade | Tumour Size (mm) | Tumour Focality | # of Foci | Tumour Site | Lymphovascular Invasion |
|-----------|--------------------|--------------------------|------------------|---------------------------|----------------------|--------------|------------------|------------------|-----------------|-----------|-------------|-------------------------|
| same      | 49                 | 41                       | 49               | 50                        | 51                   | 51           | 50               | 48               | 51              | 49        | 51          | 52                      |
| different | 3                  | 12                       | 2                | 1                         | 1                    | 1            | 1                | 2                | 1               | 0         | 2           | 1                       |
| missing   | 1                  | 0                        | 2                | 2                         | 1                    | 1            | 2                | 3                | 1               | 4         | 0           | 0                       |
| extra     | 0                  | 0                        | 0                | 0                         | 0                    | 0            | 2                | 1                | 3               | 2         | 6           | 1                       |
| Accuracy  | 0.92               | 0.77                     | 0.92             | 0.94                      | 0.96                 | 0.96         | 0.94             | 0.91             | 0.96            | 0.92      | 0.96        | 0.98                    |

|           | Insitu Component | Insitu Nuclear Grade | Necrosis | DCIS Extent | Architectural Patterns | Invasive Carcinoma Margins | Distance from Closest Margin | Closest Margin | DCIS Margins | Distance of DCIS from Closest Margin (mm) | Closest Margin DCIS |      |
|-----------|------------------|----------------------|----------|-------------|------------------------|----------------------------|------------------------------|----------------|--------------|-------------------------------------------|---------------------|------|
| same      | 50               | 40                   | 50       | 50          | 33                     | 52                         | 51                           | 44             | 47           | 40                                        | 45                  | 44   |
| different | 3                | 12                   | 2        | 2           | 3                      | 1                          | 2                            | 1              | 1            | 13                                        | 2                   | 2    |
| missing   | 0                | 1                    | 1        | 1           | 17                     | 0                          | 0                            | 8              | 5            | 0                                         | 6                   | 7    |
| extra     | 1                | 3                    | 1        | 0           | 0                      | 0                          | 2                            | 1              | 4            | 5                                         | 2                   | 3    |
| Accuracy  | 0.94             | 0.75                 | 0.94     | 0.94        | 0.62                   | 0.98                       | 0.96                         | 0.83           | 0.89         | 0.75                                      | 0.85                | 0.83 |

|           | Total LN Examined | # Sentinel LN Examined | Micro/macro metastasis | # LN w/ Micrometastasis | # LN w/ Macrometastasis | Size of Largest Macrometastasis Deposit | Extranodal Extension | Extent (mm) | Invasive Tumour Size (mm) | # Sentinel Nodes Examined | # Micrometastatic Nodes | # Macrometastatic Nodes | Pathologic Stage |
|-----------|-------------------|------------------------|------------------------|-------------------------|-------------------------|-----------------------------------------|----------------------|-------------|---------------------------|---------------------------|-------------------------|-------------------------|------------------|
| same      | 50                | 51                     | 46                     | 53                      | 52                      | 52                                      | 51                   | 53          | 49                        | 49                        | 53                      | 52                      | 49               |
| different | 2                 | 2                      | 7                      | 0                       | 1                       | 0                                       | 2                    | 0           | 2                         | 4                         | 0                       | 1                       | 3                |
| missing   | 1                 | 0                      | 0                      | 0                       | 0                       | 1                                       | 0                    | 0           | 2                         | 0                         | 0                       | 0                       | 1                |
| extra     | 1                 | 1                      | 0                      | 0                       | 0                       | 2                                       | 0                    | 5           | 4                         | 4                         | 1                       | 0                       | 0                |
| Accuracy  | 0.94              | 0.96                   | 0.87                   | 1                       | 0.98                    | 0.98                                    | 0.96                 | 1           | 0.92                      | 0.92                      | 1                       | 0.98                    | 0.92             |

Appendix C: FoI-specific Training (top) and Validation (bottom) Accuracies for Pathology Reports

*Automated Medical Chart Review for Breast Cancer:  
A Novel Natural Language Processing Software System*

|                  | Laterality                         | Surgical Indication           | Pre-Operative Biopsy | Pre-Operative Diagnosis | Neoadjuvant Treatment |      |
|------------------|------------------------------------|-------------------------------|----------------------|-------------------------|-----------------------|------|
| Same             | 48                                 | 50                            | 50                   | 49                      | 50                    |      |
| Different        | 2                                  | 0                             | 0                    | 1                       | 0                     |      |
| Missing          | 0                                  | 0                             | 0                    | 0                       | 0                     |      |
| Extra            | 0                                  | 0                             | 0                    | 0                       | 0                     |      |
| Accuracy         | 0.96                               | 1                             | 1                    | 0.98                    | 1                     |      |
| Breast Procedure | Immediate Reconstruction Mentioned | Immediate Reconstruction Type | Wire Localization    | Breast Incision Type    | Axillary Surgery      |      |
|                  | 48                                 | 48                            | 40                   | 46                      | 32                    | 49   |
|                  | 2                                  | 2                             | 8                    | 4                       | 10                    | 1    |
|                  | 0                                  | 0                             | 1                    | 0                       | 5                     | 0    |
|                  | 0                                  | 0                             | 1                    | 0                       | 3                     | 0    |
|                  | 0.96                               | 0.96                          | 0.82                 | 0.92                    | 0.68                  | 0.98 |

|                  | Laterality               | Surgical Indication | Pre-Operative Biopsy | Pre-Operative Diagnosis | Neoadjuvant Treatment |      |
|------------------|--------------------------|---------------------|----------------------|-------------------------|-----------------------|------|
| Same             | 46                       | 47                  | 49                   | 47                      | 49                    |      |
| Different        | 3                        | 2                   | 0                    | 2                       | 1                     |      |
| Missing          | 1                        | 1                   | 1                    | 1                       | 0                     |      |
| Extra            | 0                        | 0                   | 0                    | 0                       | 0                     |      |
| Accuracy         | 0.92                     | 0.94                | 0.98                 | 0.94                    | 0.98                  |      |
| Breast Procedure | Reconstruction Mentioned | Reconstruction Type | Wire Localization    | Breast Incision Type    | Axillary Surgery      |      |
|                  | 40                       | 46                  | 39                   | 44                      | 39                    | 47   |
|                  | 10                       | 4                   | 10                   | 5                       | 9                     | 1    |
|                  | 0                        | 0                   | 1                    | 1                       | 2                     | 2    |
|                  | 0                        | 0                   | 0                    | 0                       | 12                    | 1    |
|                  | 0.8                      | 0.92                | 0.78                 | 0.88                    | 0.78                  | 0.94 |

Appendix D: FoI-specific Training (top) and Validation (bottom) Accuracies for Operative Reports

*Automated Medical Chart Review for Breast Cancer:  
A Novel Natural Language Processing Software System*

|           | Invasive Carcinoma | Invasive Histologic Type | Nottingham Score | Glandular Differentiation | Nuclear Pleomorphism | Mitotic Rate | Histologic Grade | Tumour Size (mm) | Tumour Focality | # of Foci   | Tumour Site | Lymphovascular Invasion |
|-----------|--------------------|--------------------------|------------------|---------------------------|----------------------|--------------|------------------|------------------|-----------------|-------------|-------------|-------------------------|
| Precision | 0.953488372        | 0.76                     | 0.972972973      | 1                         | 1                    | 1            | 1                | 0.945945946      | 0.926829268     | 0.970588235 | 0.666666667 | 0.95                    |
| Recall    | 1                  | 1                        | 0.972972973      | 0.975609756               | 1                    | 1            | 0.972222222      | 0.945945946      | 1               | 0.916666667 | 1           | 1                       |
| F         | 0.976190476        | 0.863636364              | 0.972972973      | 0.987654321               | 1                    | 1            | 0.985915493      | 0.945945946      | 0.962025316     | 0.942857143 | 0.8         | 0.974358974             |

|           | Insitu Component | Insitu Type | Insitu Nuclear Grade | Necrosis    | DCIS Extent | Architectural Patterns | Invasive Carcinoma Margins | Distance from Closest Margin | Closest Margin | DCIS Margins | Distance of DCIS from Closest Margin (mm) | Closest Margin DCIS |
|-----------|------------------|-------------|----------------------|-------------|-------------|------------------------|----------------------------|------------------------------|----------------|--------------|-------------------------------------------|---------------------|
| Precision | 0.895833333      | 0.68        | 0.902439024          | 0.918918919 | 1           | 0.888888889            | 0.9                        | 0.909090909                  | 0.888888889    | 0.693877551  | 0.88                                      | 0.904761905         |
| Recall    | 1                | 0.971428571 | 1                    | 1           | 0.36        | 1                      | 1                          | 0.810810811                  | 0.888888889    | 1            | 0.814814815                               | 0.76                |
| F         | 0.945054945      | 0.8         | 0.948717949          | 0.957746479 | 0.529411765 | 0.941176471            | 0.947368421                | 0.857142857                  | 0.888888889    | 0.819277108  | 0.846153846                               | 0.826086957         |

| Total LN Examined | # Sentinel LN Examined | Micro/macro metastasis | # LN w/ Micrometastasis | # LN w/ Macrometastasis | Largest Macrometastasis Deposit | Extranodal Extension | Invasive Tumour Size (mm) | # Sentinel Nodes Examined | # Micrometastatic Nodes | # Macrometastatic Nodes | Pathologic Stage |             |
|-------------------|------------------------|------------------------|-------------------------|-------------------------|---------------------------------|----------------------|---------------------------|---------------------------|-------------------------|-------------------------|------------------|-------------|
| 0.938776          | 0.933333333            | 0.85106383             | 1                       | 0.954545455             | 0.833333333                     | 0.846153846          | 0.428571429               | 0.846153846               | 0.808510638             | 0.909090909             | 0.952380952      | 0.959183673 |
| 0.978723          | 1                      | 1                      | 1                       | 1                       | 0.909090909                     | 1                    | 1                         | 0.970588235               | 1                       | 1                       | 1                | 0.979166667 |
| 0.958333          | 0.965517241            | 0.91954023             | 1                       | 0.976744186             | 0.869565217                     | 0.916666667          | 0.6                       | 0.904109589               | 0.894117647             | 0.952380952             | 0.975609756      | 0.969072165 |

Appendix E: Statistics for Pathology Reports

|           | Laterality  | Surgical Indication | Pre-Operative Biopsy | Pre-Operative Diagnosis | Neoadjuvant Treatment |
|-----------|-------------|---------------------|----------------------|-------------------------|-----------------------|
| Precision | 0.93877551  | 0.979166667         | 1                    | 0.96                    | 0.980392157           |
| Recall    | 0.978723404 | 0.979166667         | 0.98                 | 1                       | 1                     |
| F         | 0.958333333 | 0.979166667         | 0.98989899           | 0.979591837             | 0.99009901            |

| Breast Procedure | Immediate Reconstruction Mentioned | Immediate Reconstruction Type | Wire Localization | Breast Incision Type | Axillary Surgery |
|------------------|------------------------------------|-------------------------------|-------------------|----------------------|------------------|
| 0.854166667      | 0.921568627                        | 0.795918367                   | 0.897959184       | 0.45                 | 0.979166667      |
| 1                | 1                                  | 0.975                         | 0.977777778       | 0.9                  | 0.959183673      |
| 0.921348315      | 0.959183673                        | 0.876404494                   | 0.936170213       | 0.6                  | 0.969072165      |

Appendix F: Statistics for Operative Reports

|    | A         | B           | C           | D           | E         | F    | G     | H |
|----|-----------|-------------|-------------|-------------|-----------|------|-------|---|
| 1  |           | column      | t best thre | t best thre | threshold | same | extra |   |
| 2  | <b>0</b>  | Laterality  | 0.7         | 0.95        | 0.82      | 48   | 0     |   |
| 3  | <b>1</b>  | Surgical In | 0.7         | 0.8         | 0.75      | 50   | 0     |   |
| 4  | <b>2</b>  | Pre-Opera   | 0.7         | 0.9         | 0.8       | 50   | 0     |   |
| 5  | <b>3</b>  | Pre-Opera   | 0.7         | 0.95        | 0.82      | 49   | 0     |   |
| 6  | <b>4</b>  | Neoadjuv    | 0.7         | 0.95        | 0.82      | 50   | 0     |   |
| 7  | <b>5</b>  | Breast Pro  | 0.7         | 0.9         | 0.8       | 48   | 0     |   |
| 8  | <b>6</b>  | Immediat    | 0.7         | 0.95        | 0.82      | 39   | 1     |   |
| 9  | <b>7</b>  | Wire Loca   | 0.7         | 0.95        | 0.82      | 46   | 0     |   |
| 10 | <b>8</b>  | Breast Inc  | 0.8         | 0.8         | 0.8       | 32   | 3     |   |
| 11 | <b>9</b>  | Axillary Su | 0.7         | 0.9         | 0.8       | 49   | 0     |   |
| 12 | <b>10</b> | Immediat    | 0.7         | 0.7         | 0.7       | 47   | 0     |   |
| 13 |           |             |             |             |           |      |       |   |

Appendix G: Example of thresholds when using vector similarities for encoding text into numbers

Double-click any column header to sort the table

|   | Study ID | Original Column                        | Corrected Column                        | Edit Distan | Extracted Data                                 |
|---|----------|----------------------------------------|-----------------------------------------|-------------|------------------------------------------------|
| 1 | 18       | incision in relation to the tumor      | incision in relation to tumor           | 4           | the skin was included in the incision directly |
| 2 | 14       | indication for                         | indication                              | 4           | not applicable, slnb done                      |
| 3 | 1        | ncision and incision relation to tumor | incision and incision relation to tumor | 1           | overlying tumor                                |
| 4 | 3        | ncision in relation to tumor           | incision in relation to tumor           | 1           | not applicable mastectomy done                 |
| 5 | 1        | ndication                              | indication                              | 1           | primary treatment                              |
| 6 | 3        | ndication                              | indication                              | 1           | completion of mastectomy after initial bcs     |

Appendix H: Autocorrected column names are automatically recorded and displayed
